# Supplementary material
Source: Springer Nature journal article supplement (https://www.springermedizin.de/resource/supplementary/12974_2011_356_MOESM1_ESM.pdf/9601500)

### BV-2 Microglia

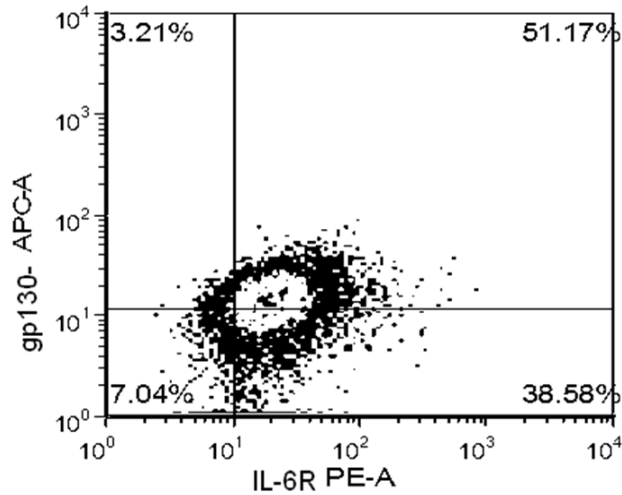

### Neuro.2A Neurons

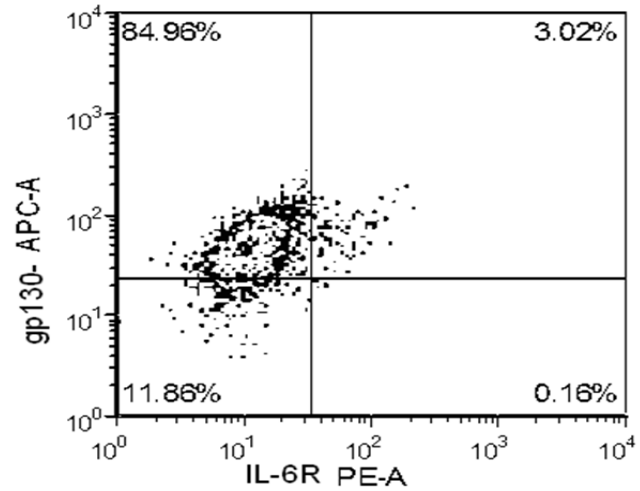

### BV-2 Microglia

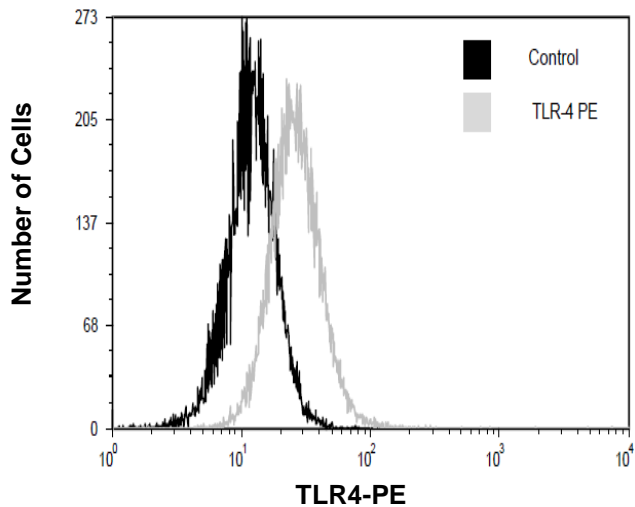

### Neuro.2A Neurons

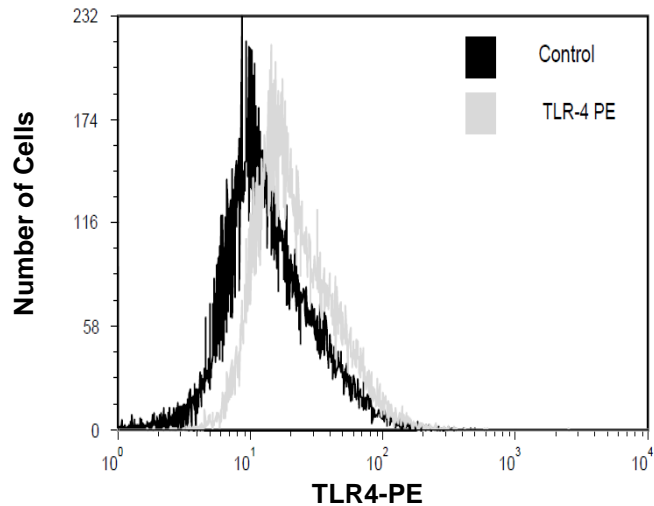

Supplement: MOESM1 [file 9601500]
